# Supplementary material
Source: PubMed Central journal article supplement (PMC3027896)
Supplement: NIHMS262982-supplement-Supplementary_Online_Materials.pdf [file NIHMS262982-supplement-Supplementary_Online_Materials.pdf]

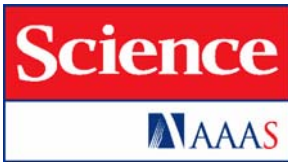

## Supporting Online Material for

### Metagenomic Analysis of the Human Distal Gut Microbiome

Steven R. Gill,\* Mihai Pop, Robert T. DeBoy, Paul B. Eckburg, Peter Turnbaugh,  
Buck S. Samuel, Jeffrey I. Gordon, David A. Relman, Claire M. Fraser-Liggett,  
Karen E. Nelson

\*To whom correspondence should be addressed. E-mail: [srgill@buffalo.edu](mailto:srgill@buffalo.edu)

Published 2 June 2006, *Science* **312**, 1355 (2006).  
DOI: 10.1126/science.1124234

#### **This PDF file includes**

Materials and Methods  
Figs. S1 and S2  
Tables S1 to S8  
References

## Science Supporting Online Material

### Materials and Methods

**Human subjects and extraction and purification of DNA.** The use of human subjects was approved by the Stanford University Administrative Panel on Human Subjects in Medical Research; all participants signed informed consent. The two subjects from which samples were obtained, ages 28 and 37, female and male respectively, had not used antibiotics or any other medications during the year prior to specimen collection. Neither had been diagnosed with any significant medical condition, nor had been subjected to surgical procedures. One of these individuals followed a vegetarian diet and the other an unrestricted diet; and one had traveled to France and Brazil during the year prior to specimen collection. Approximately 0.3 g of fecal material from each of two healthy human subjects (referred to here as Subject-7 and Subject-8) was resuspended in 5 ml of ice-cold 0.05 M potassium phosphate buffer and divided into separate 1 ml aliquots. To isolate total fecal genomic DNA, 10  $\mu$ l Proteinase K (20 mg/ml) and 50  $\mu$ l 10% SDS was added to each aliquot, and the reaction mixtures were incubated for 1 hour at 55°C. Phenol (150  $\mu$ l; pH 7.5) was added to the suspension that was then transferred to FastPrep lysing matrix D and agitated in a FastPrep FP120 instrument (Qbiogene, Carlsbad, CA) at 6.0 m/s for 40 s. The lysate was extracted twice with phenol/chloroform followed by one extraction in chloroform. DNA was precipitated with ethanol resuspended in TE buffer, and subjected to a final clean-up (Qiagen QIAamp mini spin columns; Qiagen Inc., Valencia, CA). The purified DNA was then used for construction of 16S rDNA libraries, and plasmid-based small insert (2-10 kb) libraries. Because the DNA was isolated using disruptive mechanical lysis with a FastPrep lysing matrix, the size of the purified DNA (2-10 kb) was not sufficient for construction of fosmid libraries.

**Bacterial 16S rDNA amplification.** Full-length 16S rDNA was amplified from broad-range bacterial primers Bact-8F (5'-AGAGTTTGATCCTGGCTCAG-3') and Bact-1510R (5'-CGGTTACCTTGTTACGACTT-3') (*S1*). Each 100- $\mu$ l PCR reaction contained 100 ng DNA, 100 ng of each primer, 200 mM dNTPs, 1.5 mM MgCl<sub>2</sub> and 2.5 units of Platinum *Taq* DNA polymerase (Invitrogen, Carlsbad, CA) in the manufacturer's buffer. Conditions for PCR reactions were 94°C for 60 s, followed by 30 cycles of 94°C for 60 s, 55°C for 30 s, 72°C for 60 s and a final extension of 72°C for 9 min. Amplification of group- and species-specific 16S rDNA was performed using species-specific primers and reaction conditions described in Bartosch *et al.* (*S2*). Amplified PCR products were resolved by agarose gel electrophoresis, excised from the gel and extracted using QIAquick<sup>TM</sup> Gel Extraction Kit (Qiagen).

**Cloning and sequencing.** PCR products were cloned into pCR-4-TOPO vectors (Invitrogen) and electroporated into electrocompetent *E. coli* DH10B (Invitrogen). Transformants were selected by plating onto selective SOB/amp agar plates which were incubated overnight. Colonies were picked randomly and grown by overnight incubation in SOB/amp media. Plasmid template DNA from each transformant was prepared by a modified alkaline lysis method. The 16S rDNA nucleotide sequences of the clone inserts were determined by cycle sequencing using BigDye Terminator

(Applied Biosystems, Foster City, CA) and 3.2 pmol of M13F and M13R sequencing primers. Sequences were analyzed on ABI 3730xl sequencers (Applied Biosystems) and trimmed to remove vector sequence. After trimming and adjusting for quality values, the average single sequence read length was at least 900 nucleotides in length.

**Construction and sequencing of human distal gut metagenome libraries.** Total fecal genomic DNA was suspended in sucrose nebulization buffer (50% sucrose, 0.3M NaOAc, 1X TE) and nebulized to generate random fragments ranging in size from 2 to 8 kb. Fragments between 2 and 3 kb were isolated from the nebulized DNA by agarose gel purification and extracted using QIAquick™ Gel Extraction Kit (Qiagen). Purified DNA fragments were modified by addition of Bst XI linkers to their ends, ligated to Bst XI digested pHOS2 vector (*S3*) and electroporated into *E. coli* DH10B. Transformants were selected by plating onto selective SOB/amp agar plates. The percentage of colonies or plasmid clones with inserts was estimated by agarose gel analysis of pooled plasmid DNA from a lawn of *E. coli* transformants. Approximately 90% of the plasmid clones in the metagenome libraries contained random fecal DNA inserts. Sequencing reactions were carried out using M13F and M13R primers as described above.

**Random sequence assembly.** Sequence data were assembled with Celera Assembler (*S4*) as a combination of shotgun reads from Subject-7 and Subject-8 in order to overcome the extremely low coverage provided by the shotgun reads. The combined assembly resulted in increase coverage for the organisms present in both samples. The resulting assembly was separated into Subject-7- and Subject-8-specific assemblies using software developed for this project as well as components of the AMOS assembly package (<http://amos.sourceforge.net>). To generate a subject-specific assembly within every contig in the combined assembly we retained only the reads obtained from one of the subjects, then we regenerated the contig consensus by recomputing the multiple alignment of the remaining reads. Regions of the contig not supported by any reads from the chosen subject were replaced with Ns. Optimal combined assembly was attained by lowering the threshold for statistical repeat detection (unitigger parameter -j set to -20) so that the most abundant microbial species would not be characterized as repeats and the representation of low abundance microorganisms would be increased (*S4*). Furthermore, all singleton reads (reads not placed into contigs) were mapped back to the contigs using the nucmer and show-tiling programs from the MUMmer package (*S5*), in order to identify those reads that were incorrectly omitted by the assembler. These reads were excluded from further analysis to avoid duplications. The output of Celera Assembler consists of a collection of contiguous DNA pieces (contigs) linked together by paired end reads to form scaffolds. The depth of sequence coverage in the output of Celera Assembler was computed using the cvgChop program from the AMOS package.

**Assembly validation.** Validating the correctness of an assembly is still the subject of active research even when assembling a single organism (see for example the many arguments about the quality of the various assemblies of the human genome), let alone the case of environmental sequences. Currently, other than manual curation of the data (impractical for this project) the most reliable validation method is alignment to a previously sequenced reference genome. We performed such a test by aligning the contigs produced by Celera Assembler to the draft genome of *M. smithii*. Our assembly agreed well with the reference genome indicating no major assembly problems. While

we cannot rule out the possibility that some of the contigs are mis-assembled, representing chimeras between different organisms, we believe that the majority rule used in assigning a contig to a specific taxonomic unit (see below) is immune to such assembly problems. Furthermore, we believe more errors were introduced in our analysis by the absence of reliable sequence information in public databases than by assembly errors.

**Database search parameters.** The BLASTX and BLASTP programs were used to identify putative open reading frames (ORFs) and to assign putative functions to these ORFs. Searches were performed against AllGroup.niaa; a non-redundant, in-house repository of protein data obtained from GenBank, Uniprot, Protein Research Foundation (PRF), Protein Data Bank (PDB), and Omnim. Only matches of at least 50 amino acids in length, with a  $P$  value lower than  $1e^{-15}$  and an identity greater than 35% were considered for further analysis.

**Taxonomic assignment of random shotgun sequences.** Two complementary analyses were performed to ascertain the representation of species from the bacterial, archaeal, and eukaryotic domains. Initially, the shotgun sequence assembly was mapped to a database of known 16S rDNA bacterial and archaeal sequences (RDP version 9.2 [bacterial], RDP version 8.1 (<http://rdp.cme.msu.edu>) [archaeal]) using BLASTN. The best matches (as defined by the product of percent identity and length) of rDNA sequences to the contigs and singletons were selected if they were longer than 200 base pairs (bp). Each contig or singleton that matched a known rDNA sequence was assigned to that organism.

In the second analysis, putative ORFs within the assembled contigs were identified using the long-orfs program from the Glimmer package (S6). The protein sequences corresponding to these ORFs were searched with BLASTP against AllGroup.niaa as described in Database search parameters. Only matches as defined above (in database search parameters) were considered for further analysis. For each ORF, the best BLASTP hit was used to assign the ORF to a taxonomic unit. The taxonomic assignments of the ORFs were used to assign entire contigs to specific taxonomic units. Due to the paucity of reliable phylogenetic anchors in public databases, the ORF data provides us with a reasonable approximation for the origin of each genomic fragment. In many situations multiple ORFs present in a single contig all agreed on a specific taxonomic assignment. In situations where the ORFs present in the same contig disagreed on the taxonomic assignment we chose the majority assignment if one existed; otherwise, we assigned the contig to the lowest taxonomic level where all assignments agreed (the later situation occurred in 697 of 6775 ORF-containing contigs from Subject-7 and in 1072 of 8154 ORF-containing contigs from subject-8). For the purposes of this analysis, a majority assignment is the assignment chosen by the largest number of ORFs ( $n$ ) such that the second largest assignment is shared by at most  $n/2$  ORFs. For the purposes of this study this simple procedure provides us with sufficiently reliable information, especially for assignments to taxonomic units well represented in public databases. In general, however, the specific assignments should be treated with caution due to the insufficient data available as well as to the previously reported limitations of BLAST as a tool for phylogenetic reconstruction (S7).

All contigs where the long-orfs program could not identify any putative ORFs, as well as all singletons, were searched using the same cut-off criteria as for BLASTP. The BLASTX matches represent either partial genes, or genes missed by the long-orfs program. All contigs and singletons containing reliable BLASTX matches were assigned to a specific taxonomic unit as described in the previous paragraph.

**Organism reconstruction aided by phylogenetic markers.** Partial chromosome assemblies from organisms that could be identified from their phylogenetic markers were constructed as follows. Seed contigs were generated by extracting all contigs associated with the selected phylogenetic markers, and then all contigs linked to the seed contigs were extracted by mate-pair information. Singleton reads were subsequently mapped to the selected contigs using the MUMmer alignment program (*S5*). Both reads contained in the selected contigs, and those later recruited through alignment and the use of mate-pair information, were assembled using Celera Assembler to obtain a larger assembly of the organisms of interest.

**16S rDNA phylogenetic analysis and phylotype determination.** Approximately 1000 PCR-amplified near-full length (1400-1500 bp), non-chimeric (see below) bacterial 16S rDNA sequences from each stool sample were subjected to detailed phylogenetic analysis (1024 sequences from subject-7 and 1038 from subject-8; total 2062 sequences). In addition, 132 partial-length bacterial 16S rDNA sequences (good quality sequences  $\geq 500$  bases in length) and 8 partial-length archaeal sequences (291-714 bases) from the random shotgun assembly were analyzed phylogenetically (73 bacterial and 4 archaeal sequences from subject-7; 59 bacterial and 4 archaeal sequences from subject-8). The 16S rDNA sequences were aligned to the small subunit rDNA Ribosomal Database Project II (RDP-II) (*S8*) running locally in the ARB package (*S9*) using FastAligner v1.03. Each sequence was manually edited in conjunction with its chromatogram and secondary structure information. Only unambiguous nucleotide positions were included in the analysis and primer sequences were excluded, totaling 1197 filter positions for all near-full-length bacterial 16S rDNA sequences, 341–680 positions for partial-length bacterial sequences, and 290–606 positions for partial-length archaeal sequences. The closest neighbors to our sequences among the RDP-II and NCBI GenBank databases were determined using the maximum likelihood algorithm, and such sequences were used to represent phylotypes where possible. Sequences were tested for possible chimeras using Chimera Check v2.7 (online analysis at RDP-II website, <http://rdp.cme.msu.edu/cgis/chimera.cgi?su=SSU>), and sequences without close RDP-II neighbors were subjected to a manual online BLAST analysis (NCBI website, <http://www.ncbi.nlm.nih.gov/BLAST/>). All chimeras, human sequences, vector sequences, and sequences of poor quality were deleted from further phylogenetic analysis. A phylogenetic tree with a representative from each phylotype was generated using a neighbor-joining algorithm from a Felsenstein-corrected distance matrix.

Sequences were grouped into phylotypes using Felsenstein-corrected similarity matrices such that the least similar pair within the phylotype shared at least 99% similarity for near-full-length 16S rDNA sequences and at least 97% similarity for partial-length sequences. Additionally, distance matrices were analyzed with the DOTUR program to identify phylotypes at every similarity cutoff value using the furthest-neighbor algorithm with 0.001 precision (*S10*). Sequences already present in

public databases (preferably from named organisms) were chosen to represent each phylotype whenever possible. If no such sequence met the criteria for inclusion in a phylotype, it was considered a novel phylotype, and a representative was arbitrarily selected. Novel phylotypes and sequences with uncultured GenBank neighbors were considered to represent uncultured species. Good's coverage estimation was calculated as  $[1-(n/N)] \times 100$ , where  $n$  is the number of singletons and  $N$  is the total number of sequences. Sequence rarefaction curves were created in EstimateS version 7.50 (R.K. Colwell, <http://viceroy.eeb.uconn.edu/EstimateS>), using 100 randomizations, sampling without replacement, and bias-corrected Chao1 estimation.

**Role category assignments.** For all identified genes, translation start and stop sites were refined from the coordinates of the BLASTX alignments. These evidence-based genes were given non-hypothetical names and organism assignments using their BLAST results, and cellular role categories (*SII*) were assigned in an automated fashion. Frameshifts were identified and genes merged when two adjacent ORFs shared a common database accession.

**Comparative assembly.** The comparative assembly program AMOScmp (*S12*) was used to identify organisms closely related to previously sequenced species. We iteratively used as a reference the complete genomes of *B. longum* (*S13*), *Bacteroides thetaiotaomicron* (*S14*), as well as a draft assembly of *Methanobrevibacter smithii* (*S15*).

**Orthologous groups analysis.** The DNA sequences of contigs and singletons from Subject-7 and Subject-8 were searched using BLASTX and a protein database from NCBI containing a total of 4891 COGs (clusters of orthologous groups). Each COG consists of individual proteins or groups of paralogs from at least 3 major phylogenetic lineages. The BLASTX search results were filtered for matches to individual proteins from at least two distinct phylogenetic groups for each COG, and having  $e$ -values less than  $1e-5$ .

The expected COG accumulation curve was computed analytically with the Mao Tau calculation in EstimateS version 7.50 (R.K. Colwell, <http://viceroy.eeb.uconn.edu/EstimateS>), using the number of individual COGs (from the total of 62,036 identified COGs) per unique COG function ( $n = 2407$ ). A sampling without replacement algorithm (without randomizations) was used for rarefaction of the bias-corrected Chao1 and ACE estimators of COG richness in EstimateS.

**In silico reconstructions of the microbiome's metabolome.** Identified genes (BLASTX against ALLGroup.niaa with  $e < 1e-15$ , open reading frames  $> 50$  amino acids with  $> 35\%$  identity to known sequences) were assigned enzyme commission numbers (ECs) and imported into the Washington University KEGG annotation viewer (WUBear; <http://gordonlab.wustl.edu/supplemental/Gill/>). For statistical analyses, highly redundant ECs (i.e. those with a dash) were removed, all ECs were converted to KEGG orthologous (KO) groups, and KEGG pathway hits were tallied using the latest release of KEGG (version 37). All predicted genes with Swiss-Prot accession numbers were imported into STRING, an extended COG database currently containing 179 microbial genomes, 163 of which are microbial (*S16*). These approaches allowed us to assign 17% and 31% of identified genes to KEGG maps and COG terms, respectively. Two metrics were then used to define whether a KEGG pathway or a COG term was enriched in the

human distal gut microbiome: (i) an odds ratio and (ii) a probability derived from a binomial distribution. The odds ratio can be thought of as the relative risk of observing a given group in the sample relative to the comparison dataset. We calculated the odds ratios using  $(A/B)/(C/D)$  where  $A$  is the number of hits to a given category in the human gut microbiome,  $B$  is the number of hits to all other categories in the human gut microbiome,  $C$  is the number of hits to a given category in the comparison dataset, and  $D$  is the number of hits to all other categories in the comparison dataset. The binomial distribution was used to allow sampling with replacement, since the same gene could be present multiple times in each gut dataset. We used the same input values for the binomial to calculate the probability of observed  $A$  hits given  $A + B$  total chances. This calculation assumes that the genes are normally distributed across metabolic groups and that the expected frequency is  $C/(C + D)$  (the frequency observed in the comparison dataset).

To minimize false negatives, no corrections were made for multiple testing. For COG analysis, the distribution of genes in the STRING database (163 microbial genomes) was used to calculate the odds ratio and binomial probability of obtaining the observed number of hits in each group. For KEGG analysis, the statistical calculations were performed against three separate comparison datasets: all bacteria in KEGG (total of 202 genomes), the *Homo sapiens* genome, and all archaea in KEGG (21 genomes). These comparisons allowed us to identify metabolic properties that were characteristic of the gut microbiome, that were characteristic of the bacterial members of the community, and that could potentially endow the human host with additional physiological traits. Groups with an odds ratio  $> 1$  and  $P < 0.05$  were defined as enriched and groups with an odds ratio  $< 1$  and  $P < 0.05$  as under-represented.

## Supporting Figures

**Figure S1.** (A) Rarefaction curves for the combined 16S rDNA stool sequences at multiple phylotype cutoff levels. The curves appear to flatten as the phylotype cutoffs are relaxed below 95%, and every clone has been sampled more than once at the 80% cutoff. The total numbers of phylotypes (OTUs) are listed in the inset. (B) Collector's curves of observed and estimated phylotype richness for the combined subject data set. Each curve represents phylotype richness as clones are selected in a random order. Richness was estimated by two different calculations, abundance-based coverage estimation (ACE) and Chao1 richness estimation. Final richness estimations were 334 (ACE) and 303 (Chao1) phylotypes; however, the lack of plateaued curves indicates that both observed and estimated richness will increase with continued clone sequencing. (C) and (D) Collector's curves of observed and estimated phylotype richness for stools 7 and 8 are shown separately in (C) and (D), respectively. Numbers of phylotypes are presented in parentheses

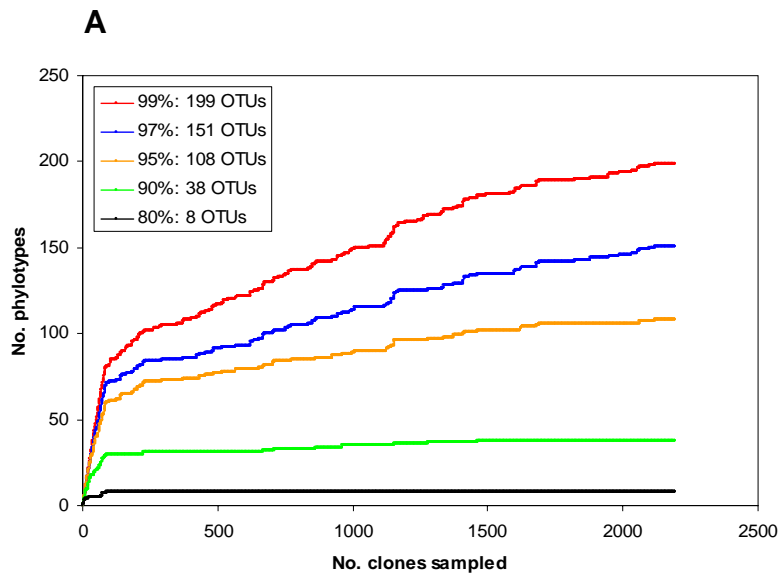



**B**

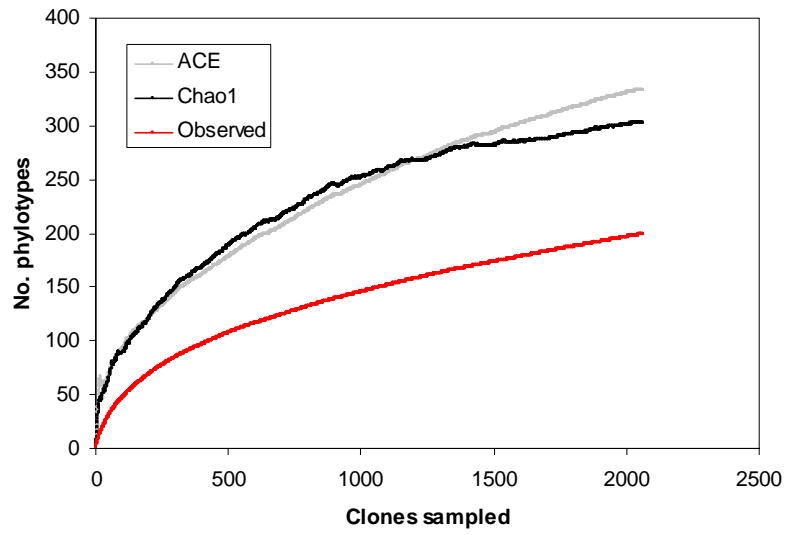

**C**

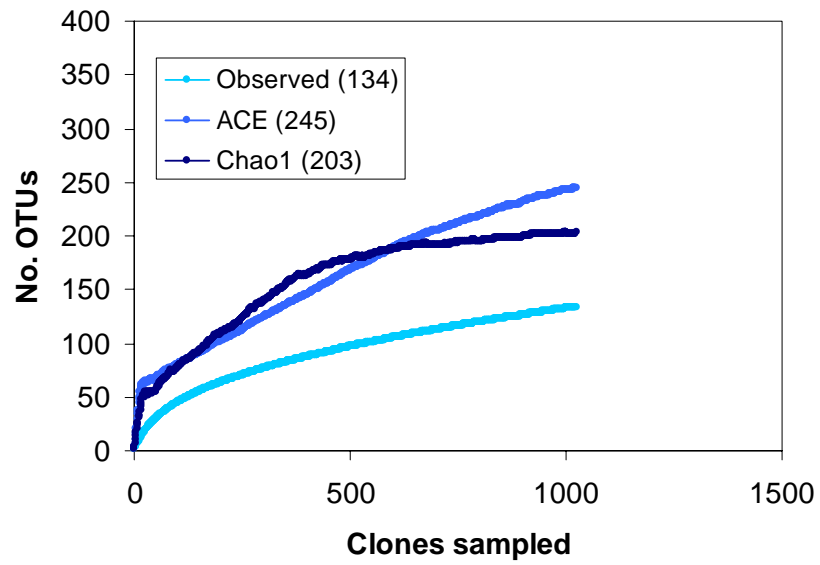

**D**

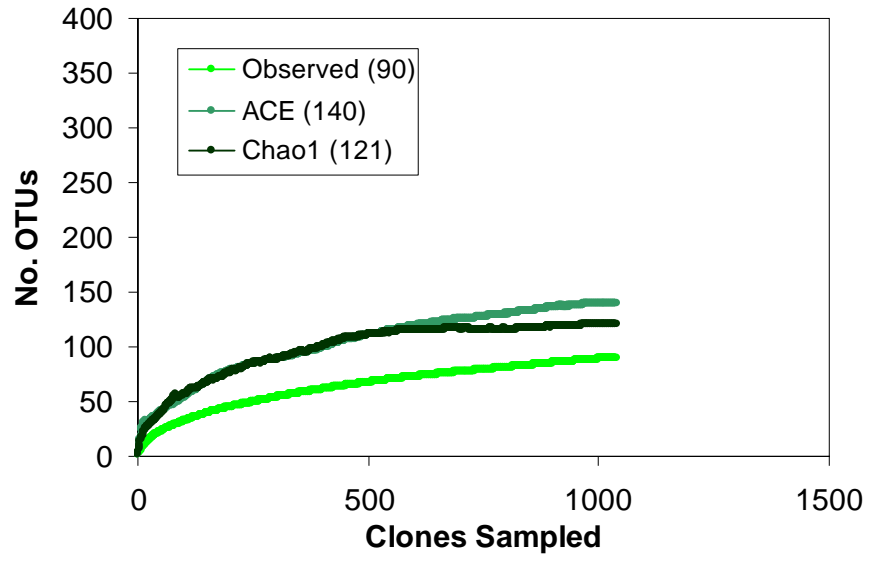

**Fig. S2.** Enrichment for genes in the starch metabolism pathway in the human distal gut microbiome. The left and right sides of each boxed Enzyme Commission (EC) number indicate whether the microbial gene product is present in Subjects-7 and 8, respectively, and to what extent (color scale: white no hits; red  $\geq 17$  hits). A total of 301 out of 8625 predicted genes are found in this metabolic network ( $p < 0.001$ ).

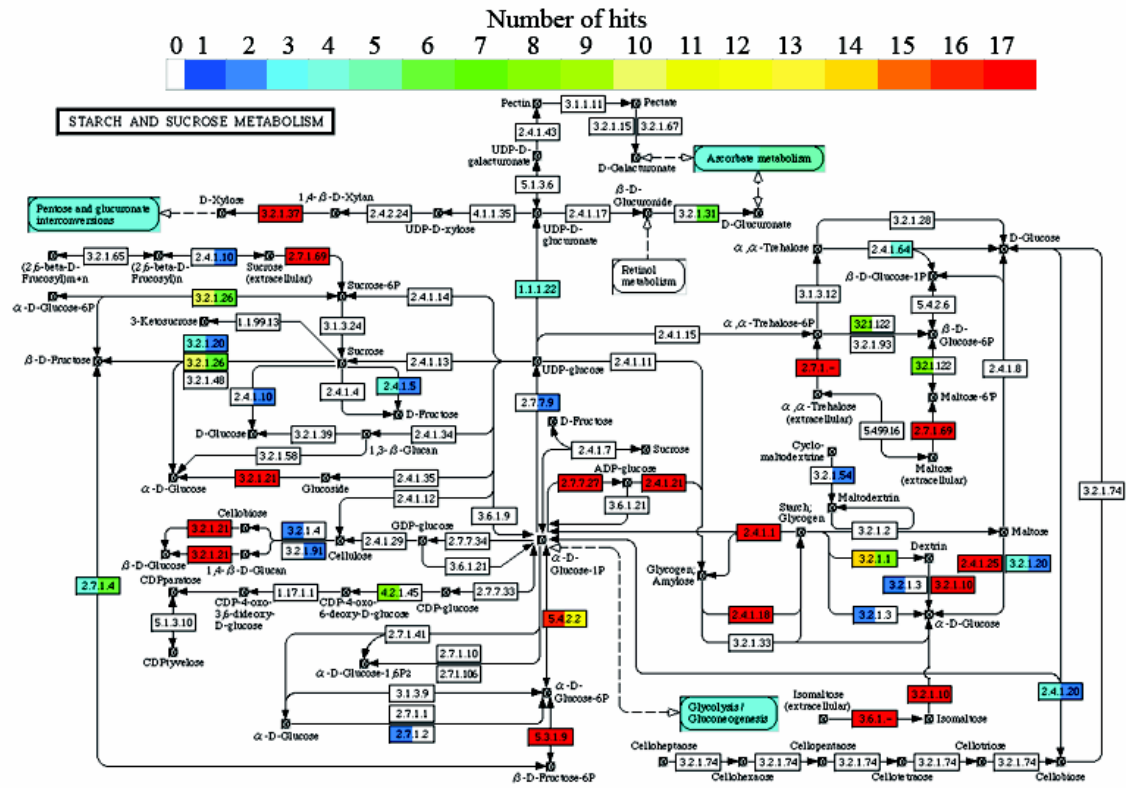

## Supporting Tables

**Table S1.** Assignment of shotgun data to specific orders using two complementary methods: shotgun rDNA-contigs and singletons that matched a 16S rDNA operon from the specified order; best hit BLASTX contigs-contigs that contain complete genes (as identified by Glimmer long-orfs) or partial genes (as identified by BLASTX) whose best database match belong to the specific order; best match BLASTX singletons-singletons that contain partial gene (identified by BLASTX) whose best database hit belongs to the specific order. All results separated into the two human subjects (7 and 8). The numbers represent the number of bases from the shotgun data that can be associated with a specific order. When interpreting this Table it is important to take into account the reliability of each source of information. Assignments based on the 16S rDNA are the most reliable due to the large amount of data available for this marker, however this method can only be applied to the relatively few contigs or singletons that contain a portion of the 16S rDNA. At the other end of the scale are the assignments of singleton reads which represent regions of extremely low coverage and contain only partial gene fragments. In addition, for any specific genome in our samples, the number of singletons is inversely proportional to the quality of the assembly. One example of this phenomenon is the order *Methanobacteriales* which appears to be poorly represented in the “best hit BLASTX singletons” column even though this order is well represented in our samples. The singleton data should therefore be used cautiously with its main role being to supplement the contig data for the low-abundance organisms that could not be properly assembled.

| Taxonomy             |                     |                        |                         | shotgun rDNA       |        |         |         | best hit blastx contigs |         |            |         | best hit blastx singletons |         |           |         |      |
|----------------------|---------------------|------------------------|-------------------------|--------------------|--------|---------|---------|-------------------------|---------|------------|---------|----------------------------|---------|-----------|---------|------|
|                      |                     |                        |                         | 7                  | %      | 8       | %       | 7                       | %       | 8          | %       | 7                          | %       | 8         | %       |      |
| BACTERIA             | Firmicutes          | Bacilli                | Bacillales              | 1,201              | 0.81   |         | 0.00    | 994,084                 | 9.94    | 1,597,352  | 13.67   | 1,475,166                  | 15.02   | 1,270,429 | 14.96   |      |
|                      |                     |                        | Lactobacillales         | 853                | 0.58   | 930     | 0.68    | 973,729                 | 9.74    | 1,450,336  | 12.41   | 1,005,572                  | 10.24   | 1,016,490 | 11.97   |      |
|                      |                     | Clostridia             | Clostridiales           | 70,055             | 47.38  | 102,140 | 74.16   | 1,749,529               | 17.50   | 3,167,301  | 27.10   | 2,646,766                  | 26.96   | 2,394,773 | 28.20   |      |
|                      |                     |                        | Thermoanaerobacteriales |                    | 0.00   |         | 0.00    | 625,953                 | 6.26    | 1,027,484  | 8.79    | 1,003,757                  | 10.22   | 978,474   | 11.52   |      |
|                      |                     |                        | Halanaerobiales         |                    | 0.00   |         | 0.00    | 0                       | 0.00    | 0          | 0.00    | 0                          | 0.00    | 953       | 0.01    |      |
|                      |                     | Mollicutes             | Acholeplasmatales       |                    | 0.00   |         | 0.00    | 2,020                   | 0.02    | 5,158      | 0.04    | 15,933                     | 0.16    | 11,032    | 0.13    |      |
|                      |                     |                        | Entomoplasmatales       |                    | 0.00   |         | 0.00    | 8,820                   | 0.09    | 2,153      | 0.02    | 23,798                     | 0.24    | 10,316    | 0.12    |      |
|                      |                     |                        | Anaeoplasmatales        |                    | 0.00   |         | 0.00    | 3,620                   | 0.04    | 2,456      | 0.02    | 1,762                      | 0.02    | 2,616     | 0.03    |      |
|                      |                     |                        | Mycoplasmatales         |                    | 0.00   |         | 0.00    | 17,627                  | 0.18    | 32,047     | 0.27    | 35,840                     | 0.37    | 21,683    | 0.26    |      |
|                      |                     | Actinobacteria         | Actinobacteria          | Actinomycetales    | 332    | 0.22    | 793     | 0.58                    | 474,820 | 4.75       | 297,985 | 2.55                       | 345,799 | 3.52      | 250,739 | 2.95 |
|                      | Bifidobacteriales   |                        |                         | 31,443             | 21.27  | 5,101   | 3.70    | 2,183,231               | 21.84   | 615,749    | 5.27    | 699,336                    | 7.12    | 235,529   | 2.77    |      |
|                      | Coriobacteriales    |                        |                         | 25,781             | 17.44  | 10,804  | 7.84    | 0                       | 0.00    | 0          | 0.00    | 0                          | 0.00    | 0         | 0.00    |      |
|                      | Proteobacteria      | Alpha proteobacteria   | Caulobacterales         |                    | 0.00   |         | 0.00    | 10,349                  | 0.10    | 12,194     | 0.10    | 9,752                      | 0.10    | 13,102    | 0.15    |      |
|                      |                     |                        | Rhizobiales             |                    | 0.00   |         | 0.00    | 115,127                 | 1.15    | 151,347    | 1.30    | 139,897                    | 1.42    | 122,856   | 1.45    |      |
|                      |                     |                        | Rhodobacteriales        |                    | 0.00   |         | 0.00    | 978                     | 0.01    | 1,512      | 0.01    | 3,402                      | 0.03    | 0         | 0.00    |      |
|                      |                     |                        | Rhodospirillales        |                    | 0.00   |         | 0.00    | 924                     | 0.01    | 2,074      | 0.02    | 937                        | 0.01    | 2,472     | 0.03    |      |
|                      |                     |                        | Rickettsiales           |                    | 0.00   |         | 0.00    | 3,750                   | 0.04    | 9,356      | 0.08    | 10,339                     | 0.11    | 5,982     | 0.07    |      |
|                      |                     |                        | Sphingomonadales        |                    | 0.00   |         | 0.00    | 10,815                  | 0.11    | 0          | 0.00    | 4,244                      | 0.04    | 2,676     | 0.03    |      |
|                      |                     |                        | Beta proteobacteria     | Burkholderiales    |        | 0.00    |         | 0.00                    | 73,843  | 0.74       | 38,134  | 0.33                       | 65,670  | 0.67      | 44,742  | 0.53 |
|                      |                     |                        |                         | Methylophilales    |        | 0.00    |         | 0.00                    | 0       | 0.00       | 0       | 0.00                       | 850     | 0.01      | 0       | 0.00 |
| Neisseriales         |                     |                        |                         |                    | 0.00   |         | 0.00    | 26,515                  | 0.27    | 34,357     | 0.29    | 42,403                     | 0.43    | 31,306    | 0.37    |      |
| Nitrosomonadales     |                     |                        |                         |                    | 0.00   |         | 0.00    | 10,099                  | 0.10    | 11,362     | 0.10    | 18,515                     | 0.19    | 10,067    | 0.12    |      |
| Rhodocyclales        |                     |                        |                         | 0.00               |        | 0.00    | 0       | 0.00                    | 0       | 0.00       | 1,458   | 0.01                       | 3,600   | 0.04      |         |      |
| Delta proteobacteria |                     | Bdellovibrionales      |                         | 0.00               |        | 0.00    | 9,301   | 0.09                    | 20,224  | 0.17       | 18,032  | 0.18                       | 8,128   | 0.10      |         |      |
|                      |                     | Desulfobacteriales     |                         | 0.00               |        | 0.00    | 51,124  | 0.51                    | 45,737  | 0.39       | 58,507  | 0.60                       | 50,195  | 0.59      |         |      |
|                      |                     | Desulfovibrionales     |                         | 0.00               |        | 0.00    | 42,501  | 0.43                    | 67,324  | 0.58       | 71,580  | 0.73                       | 51,430  | 0.61      |         |      |
|                      |                     | Desulfuromonadales     |                         | 0.00               |        | 0.00    | 119,409 | 1.19                    | 116,716 | 1.00       | 144,283 | 1.47                       | 97,783  | 1.15      |         |      |
|                      |                     | Mycococcales           |                         | 0.00               |        | 0.00    | 4,088   | 0.04                    | 7,018   | 0.06       | 9,933   | 0.10                       | 2,725   | 0.03      |         |      |
| Gamma proteobacteria |                     | Epsilon proteobacteria | Campylobacteriales      |                    | 0.00   |         | 0.00    | 64,310                  | 0.64    | 71,518     | 0.61    | 62,378                     | 0.64    | 76,007    | 0.89    |      |
|                      |                     |                        | Acidithiobacillales     |                    | 0.00   |         | 0.00    | 0                       | 0.00    | 0          | 0.00    | 2,585                      | 0.03    | 0         | 0.00    |      |
|                      |                     |                        | Alteromonadales         |                    | 0.00   |         | 0.00    | 15,087                  | 0.15    | 17,281     | 0.15    | 15,703                     | 0.16    | 24,933    | 0.29    |      |
|                      |                     |                        | Aeromonadales           |                    | 0.00   |         | 0.00    | 2,496                   | 0.02    | 0          | 0.00    | 2,507                      | 0.03    | 914       | 0.01    |      |
|                      |                     |                        | Cardiobacteriales       |                    | 0.00   |         | 0.00    | 3,208                   | 0.03    | 2,379      | 0.02    | 1,782                      | 0.02    | 1,736     | 0.02    |      |
|                      |                     |                        | Chromatiales            |                    | 0.00   |         | 0.00    | 0                       | 0.00    | 0          | 0.00    | 578                        | 0.01    | 887       | 0.01    |      |
|                      |                     |                        | Enterobacteriales       |                    | 0.00   |         | 0.00    | 140,297                 | 1.40    | 176,066    | 1.51    | 191,099                    | 1.95    | 137,205   | 1.62    |      |
|                      |                     |                        | Legionellales           |                    | 0.00   |         | 0.00    | 17,326                  | 0.17    | 16,622     | 0.14    | 19,392                     | 0.20    | 15,601    | 0.18    |      |
|                      |                     |                        | Methylococcales         |                    | 0.00   |         | 0.00    | 13,954                  | 0.14    | 15,227     | 0.13    | 27,182                     | 0.28    | 15,253    | 0.18    |      |
|                      |                     |                        | Pasteurellales          |                    | 0.00   |         | 0.00    | 61,969                  | 0.62    | 90,921     | 0.78    | 89,367                     | 0.91    | 64,313    | 0.76    |      |
|                      |                     |                        | Pseudomonadales         |                    | 0.00   |         | 0.00    | 47,911                  | 0.48    | 43,324     | 0.37    | 36,858                     | 0.38    | 41,051    | 0.48    |      |
|                      |                     |                        | Thiotrichales           |                    | 0.00   |         | 0.00    | 0                       | 0.00    | 0          | 0.00    | 861                        | 0.01    | 0         | 0.00    |      |
|                      |                     |                        | Vibrionales             |                    | 0.00   |         | 0.00    | 52,010                  | 0.52    | 72,984     | 0.62    | 76,030                     | 0.77    | 79,910    | 0.94    |      |
|                      |                     |                        | Xanthomonadales         |                    | 0.00   |         | 0.00    | 17,469                  | 0.17    | 30,631     | 0.26    | 22,488                     | 0.23    | 26,694    | 0.31    |      |
|                      | Fusobacteria        |                        | Fusobacteria            | Fusobacteriales    |        | 0.00    |         | 0.00                    | 173,171 | 1.73       | 236,794 | 2.03                       | 190,353 | 1.94      | 205,932 | 2.42 |
| Fibrobacteres        | Fibrobacteres       | Fibrobacteriales       |                         | 0.00               |        | 0.00    | 0       | 0.00                    | 0       | 0.00       | 0       | 0.00                       | 869     | 0.01      |         |      |
| Acidobacteria        | Bacteroidetes       | Bacteroidales          |                         | 0.00               |        | 0.00    | 273,673 | 2.74                    | 395,831 | 3.39       | 332,370 | 3.38                       | 333,432 | 3.93      |         |      |
|                      |                     | Flavobacteriales       |                         | 0.00               |        | 0.00    | 2,899   | 0.03                    | 4,000   | 0.03       | 2,482   | 0.03                       | 2,799   | 0.03      |         |      |
| Sphingobacteria      | Sphingobacteriales  | Sphingobacteriales     |                         | 0.00               |        | 0.00    | 0       | 0.00                    | 0       | 0.00       | 1,753   | 0.02                       | 777     | 0.01      |         |      |
|                      |                     | Spirochaetes           | Spirochaetes            | Spirochaetales     |        | 0.00    |         | 0.00                    | 218,073 | 2.18       | 251,060 | 2.15                       | 272,717 | 2.78      | 216,296 | 2.55 |
| Cyanobacteria        | Chroococcales       | Chroococcales          |                         | 0.00               |        | 0.00    | 47,969  | 0.48                    | 45,520  | 0.39       | 47,036  | 0.48                       | 50,965  | 0.60      |         |      |
|                      |                     | Nostocales             |                         | 0.00               |        | 0.00    | 29,726  | 0.30                    | 37,954  | 0.32       | 26,804  | 0.27                       | 40,408  | 0.48      |         |      |
|                      |                     | Prochlorales           |                         | 0.00               |        | 0.00    | 3,820   | 0.04                    | 5,988   | 0.05       | 13,634  | 0.14                       | 10,048  | 0.12      |         |      |
|                      |                     | Stigonematales         |                         | 0.00               |        | 0.00    | 0       | 0.00                    | 0       | 0.00       | 0       | 0.00                       | 0       | 0.00      |         |      |
|                      |                     | Oscillatoriales        |                         | 0.00               |        | 0.00    | 0       | 0.00                    | 2,552   | 0.02       | 821     | 0.01                       | 1,810   | 0.02      |         |      |
|                      |                     | Gloeobacteria          | Gloeobacteriales        |                    | 0.00   |         | 0.00    | 27,658                  | 0.28    | 19,582     | 0.17    | 12,269                     | 0.12    | 17,167    | 0.20    |      |
| Chlamydiae           | Chlamydiae          | Chlamydiales           |                         | 0.00               |        | 0.00    | 24,682  | 0.25                    | 15,658  | 0.13       | 15,610  | 0.16                       | 9,697   | 0.11      |         |      |
| Dietyogloimi         | Dietyogloimi        | Dietyogloimales        |                         | 0.00               |        | 0.00    | 0       | 0.00                    | 0       | 0.00       | 0       | 0.00                       | 0       | 0.00      |         |      |
| Deinococci           | Deinococci          | Deinococcales          |                         | 0.00               |        | 0.00    | 22,803  | 0.23                    | 32,526  | 0.28       | 18,393  | 0.19                       | 11,179  | 0.13      |         |      |
|                      |                     | Thermales              |                         | 0.00               |        | 0.00    | 15,105  | 0.15                    | 22,305  | 0.19       | 34,622  | 0.35                       | 20,258  | 0.24      |         |      |
| Chloroflexi          | Chloroflexi         | Chloroflexales         |                         | 0.00               |        | 0.00    | 754     | 0.01                    | 0       | 0.00       | 859     | 0.01                       | 796     | 0.01      |         |      |
| Thermotogae          | Thermotogae         | Thermotogales          |                         | 0.00               |        | 0.00    | 39,088  | 0.39                    | 68,798  | 0.59       | 75,729  | 0.77                       | 86,961  | 1.02      |         |      |
| Planctomy cetes      | Planctomy cetacia   | Planctomy cetales      |                         | 0.00               |        | 0.00    | 23,524  | 0.24                    | 39,945  | 0.34       | 30,686  | 0.31                       | 21,728  | 0.26      |         |      |
| Chlorobi             | Chlorobia           | Chlorobiales           |                         | 0.00               |        | 0.00    | 33,531  | 0.34                    | 28,895  | 0.25       | 28,792  | 0.29                       | 30,862  | 0.36      |         |      |
| Thermomicrobia       | Thermomicrobia      | Thermomicrobiales      |                         | 0.00               |        | 0.00    | 0       | 0.00                    | 0       | 0.00       | 859     | 0.01                       | 0       | 0.00      |         |      |
| Aquificae            | Aquificae           | Aquificales            |                         | 0.00               |        | 0.00    | 16,124  | 0.16                    | 26,172  | 0.22       | 24,646  | 0.25                       | 14,535  | 0.17      |         |      |
| ARCHAEA              | Crenarchaeota       | Thermoprotei           | Desulfurococcales       |                    | 0.00   |         | 0.00    | 0                       | 0.00    | 1,922      | 0.02    | 936                        | 0.01    | 3,451     | 0.04    |      |
|                      |                     |                        | Cenarchaeales           |                    | 0.00   |         | 0.00    | 0                       | 0.00    | 1,487      | 0.01    | 0                          | 0.00    | 0         | 0.00    |      |
|                      |                     |                        | Sulfolobales            |                    | 0.00   |         | 0.00    | 9,190                   | 0.09    | 8,760      | 0.07    | 6,654                      | 0.07    | 3,336     | 0.04    |      |
|                      |                     |                        | Thermoproteales         |                    | 0.00   |         | 0.00    | 0                       | 0.00    | 2,424      | 0.02    | 1,626                      | 0.02    | 1,628     | 0.02    |      |
|                      | Euryarchaeota       | Archaeoglobi           | Archaeoglobales         |                    | 0.00   |         | 0.00    | 15,239                  | 0.15    | 24,045     | 0.21    | 18,983                     | 0.19    | 27,526    | 0.32    |      |
|                      |                     |                        | Halobacteriales         |                    | 0.00   |         | 0.00    | 2,616                   | 0.03    | 995        | 0.01    | 6,000                      | 0.06    | 3,291     | 0.04    |      |
|                      |                     |                        | Methanomicrombia        | Methanosarcinales  |        | 0.00    |         | 0.00                    | 78,135  | 0.78       | 134,022 | 1.15                       | 109,236 | 1.11      | 111,141 | 1.31 |
|                      |                     |                        | Methanobacteria         | Methanobacteriales | 18,188 | 12.30   | 17,970  | 13.05                   | 906,553 | 9.07       | 916,899 | 7.85                       | 36,703  | 0.37      | 29,430  | 0.35 |
|                      |                     |                        | Methanococci            | Methanococcales    |        | 0.00    |         | 0.00                    | 44,413  | 0.44       | 71,172  | 0.61                       | 58,126  | 0.59      | 61,272  | 0.72 |
|                      |                     |                        | Methanopyri             | Methanopyrales     |        | 0.00    |         | 0.00                    | 8,053   | 0.08       | 6,504   | 0.06                       | 6,486   | 0.07      | 12,837  | 0.15 |
| Thermococci          | Thermococcales      |                        | 0.00                    |                    | 0.00   | 24,248  | 0.24    | 27,264                  | 0.23    | 34,841     | 0.35    | 28,160                     | 0.33    |           |         |      |
| Thermoplasmatata     | Thermoplasmatatales |                        | 0.00                    |                    | 0.00   | 6,910   | 0.07    | 5,060                   | 0.04    | 6,810      | 0.07    | 9,932                      | 0.12    |           |         |      |
| Totals:              |                     |                        |                         | 147,853            | 100.00 | 137,738 | 100.00  | 9,996,250               | 100.00  | 11,686,463 | 100.00  | 9,819,177                  | 100.00  | 8,493,125 | 100.00  |      |

**Table S2.** Distribution of genes among KEGG pathways and COGs.

|                                                                                     | <b>Sample 7</b> | <b>Sample 8</b> | <b>Samples 7,8</b> |
|-------------------------------------------------------------------------------------|-----------------|-----------------|--------------------|
| <b>Total number of predicted genes</b>                                              | 25077           | 25087           | 50164              |
| <b>Genes assigned to COGs</b>                                                       | 7563            | 8097            | 15660              |
| <b>Enriched COGs (<math>P&lt;0.05</math>)<sup>1</sup></b>                           | 733 (5544)      | 718 (5986)      | 788 (11847)        |
| <b>Genes assigned to KEGG pathways</b>                                              | 4468            | 4157            | 8625               |
| <b>Enriched KEGG pathways vs. all bacteria (<math>P&lt;0.05</math>)<sup>2</sup></b> | 26(2054)        | 23(1748)        | 28 (4194)          |
| <b>Enriched KEGG pathways vs. all archaea (<math>P&lt;0.05</math>)<sup>2</sup></b>  | 32(1845)        | 30(1784)        | 37 (4257)          |
| <b>Enriched KEGG pathways vs. H.sapiens (<math>P&lt;0.05</math>)<sup>2</sup></b>    | 41 (2626)       | 39 (2462)       | 45 (5351)          |

<sup>1</sup>Number of COGs (number of genes assigned to COGs) enriched in the human distal gut microbiome compared to all microbial genomes in the STRING extended database (163).

<sup>2</sup>Number of KEGG pathways (number of genes assigned to KEGG pathways) enriched in human distal gut microbiome compared to the respective dataset.

**Table S3.** KEGG pathways enriched or under-represented in the human gut microbiome relative to all bacterial genomes in KEGG, the human genome, and all archaeal genomes in KEGG.<sup>+</sup>

| <b>KEGG Category</b>           | <b>Pathway</b>                           | <b>Hits</b> | <b>Bacteria</b> | <b>H.sapiens</b> | <b>Archaea</b> |
|--------------------------------|------------------------------------------|-------------|-----------------|------------------|----------------|
| <b>Carbohydrate Metabolism</b> | Nucleotide sugars metabolism             | 97          | 1.02            | 12.52            | 0.71           |
|                                | Galactose metabolism                     | 271         | 1.29            | 11.05            | 3.58           |
|                                | Aminosugars metabolism                   | 245         | 1.27            | 9.97             | 8.96           |
|                                | Starch and sucrose metabolism            | 485         | 1.81            | 8.90             | 3.84           |
|                                | Pentose phosphate pathway                | 260         | 1.11            | 8.06             | 2.02           |
|                                | Fructose and mannose metabolism          | 235         | 0.98            | 6.37             | 2.08           |
|                                | Propanoate metabolism                    | 204         | 0.90            | 6.30             | 0.67           |
|                                | Glycolysis / Gluconeogenesis             | 429         | 1.01            | 5.87             | 1.48           |
|                                | Pyruvate metabolism                      | 283         | 0.87            | 5.76             | 0.80           |
|                                | Butanoate metabolism                     | 152         | 0.59            | 5.46             | 0.53           |
|                                | Glyoxylate and dicarboxylate metabolism  | 61          | 0.41            | 4.36             | 0.55           |
|                                | Inositol metabolism                      | 32          | 0.69            | 4.11             | 1.02           |
|                                | C5-Branched dibasic acid metabolism      | 11          | 0.18            | 3.53             | 0.15           |
|                                | Ascorbate and aldarate metabolism        | 20          | 0.56            | 3.21             | 1.19           |
|                                | Pentose and glucuronate interconversions | 91          | 0.95            | 2.66             | 2.50           |
|                                | Citrate cycle (TCA cycle)                | 72          | 0.37            | 2.57             | 0.27           |
| Inositol phosphate metabolism  | 6                                        | 0.26        | 0.16            | 0.22             |                |
| <b>Energy Metabolism</b>       | Carbon fixation                          | 197         | 0.96            | 7.10             | 1.06           |

|                                           |                                                        |     |      |        |       |
|-------------------------------------------|--------------------------------------------------------|-----|------|--------|-------|
|                                           | ATP synthesis                                          | 73  | 0.60 | 5.88   | 0.52  |
|                                           | Nitrogen metabolism                                    | 155 | 0.73 | 4.36   | 0.75  |
|                                           | Sulfur metabolism                                      | 35  | 0.35 | 3.75   | 0.62  |
|                                           | Methane metabolism                                     | 40  | 0.56 | 3.67   | 0.36  |
|                                           | Reductive carboxylate cycle (CO <sub>2</sub> fixation) | 42  | 0.24 | 2.70   | 0.12  |
|                                           | ATPases                                                | 70  | 2.06 | 2.65   | 2.67  |
| <b>Lipid Metabolism</b>                   | Biosynthesis of steroids                               | 164 | 1.65 | 9.66   | 2.31  |
|                                           | Glycerolipid metabolism                                | 133 | 1.03 | 2.26   | 1.59  |
|                                           | Fatty acid metabolism                                  | 46  | 0.27 | 0.64   | 0.20  |
|                                           | Prostaglandin and leukotriene metabolism               | 2   | 0.15 | 0.04   | 0.30  |
|                                           | Androgen and estrogen metabolism                       | 1   | 0.22 | 0.02   | 0.46  |
| <b>Nucleotide Metabolism</b>              | Pyrimidine metabolism                                  | 799 | 1.34 | 6.98   | 1.09  |
|                                           | Purine metabolism                                      | 762 | 1.23 | 4.28   | 1.08  |
| <b>Amino Acid Metabolism</b>              | Lysine biosynthesis                                    | 220 | 1.56 | 143.21 | 1.67  |
|                                           | Phenylalanine, tyrosine and tryptophan biosynthesis    | 335 | 1.13 | 21.96  | 0.79  |
|                                           | Valine, leucine and isoleucine biosynthesis            | 262 | 1.41 | 21.37  | 1.04  |
|                                           | Alanine and aspartate metabolism                       | 389 | 1.77 | 17.05  | 1.36  |
|                                           | Glutamate metabolism                                   | 356 | 1.49 | 11.12  | 1.11  |
|                                           | Histidine metabolism                                   | 242 | 1.85 | 8.75   | 1.68  |
|                                           | Methionine metabolism                                  | 195 | 1.94 | 8.44   | 2.01  |
|                                           | Urea cycle and metabolism of amino groups              | 274 | 1.70 | 7.77   | 1.59  |
|                                           | Glycine, serine and threonine metabolism               | 286 | 0.89 | 7.17   | 0.86  |
|                                           | Cysteine metabolism                                    | 68  | 0.53 | 4.38   | 0.65  |
|                                           | Arginine and proline metabolism                        | 239 | 1.01 | 4.08   | 0.82  |
|                                           | Phenylalanine metabolism                               | 46  | 0.51 | 2.96   | 0.55  |
|                                           | Lysine degradation                                     | 79  | 0.60 | 2.42   | 0.85  |
|                                           | Tyrosine metabolism                                    | 49  | 0.43 | 1.57   | 0.33  |
|                                           | Valine, leucine and isoleucine degradation             | 46  | 0.24 | 1.41   | 0.22  |
|                                           | Tryptophan metabolism                                  | 43  | 0.29 | 0.63   | 0.40  |
| <b>Non-peptidal Amino Acid Metabolism</b> | D-Glutamine and D-glutamate metabolism                 | 91  | 2.03 | 14.68  | 3.91  |
|                                           | Cyanoamino acid metabolism                             | 85  | 1.25 | 6.85   | 1.32  |
|                                           | Selenoamino acid metabolism                            | 149 | 1.11 | 5.35   | 1.31  |
|                                           | beta-Alanine metabolism                                | 77  | 0.69 | 3.54   | 0.65  |
|                                           | Taurine and hypotaurine metabolism                     | 44  | 0.90 | 3.54   | 2.74  |
|                                           | Glutathione metabolism                                 | 22  | 0.23 | 0.38   | 0.75  |
| <b>Glycan Biosynthesis and Metabolism</b> | Peptidoglycan biosynthesis                             | 239 | 1.83 | 77.88  | 7.06  |
|                                           | Glycosaminoglycan degradation                          | 58  | 2.87 | 5.33   | 4.19  |
|                                           | N-Glycan degradation                                   | 58  | 2.34 | 2.49   | 3.18  |
|                                           | Glycosphingolipid metabolism                           | 78  | 3.88 | 1.93   | 4.66  |
|                                           | Globoside metabolism                                   | 8   | 0.52 | 0.51   | 10.96 |
|                                           | N-Glycan biosynthesis                                  | 2   | 0.56 | 0.10   | 0.11  |
| <b>Polyketides/</b>                       | Biosynthesis of ansamycins                             | 49  | 2.27 | 10.51  | 2.59  |

|                                              |                                             |     |      |       |      |
|----------------------------------------------|---------------------------------------------|-----|------|-------|------|
| <b>Nonribosomal Peptides</b>                 | Polyketide sugar unit biosynthesis          | 11  | 0.47 | 7.06  | 0.18 |
| <b>Metabolism of Cofactors and Vitamins</b>  | Thiamine metabolism                         | 39  | 1.15 | 12.54 | 0.67 |
|                                              | One carbon pool by folate                   | 113 | 1.08 | 10.43 | 1.69 |
|                                              | Pantothenate and CoA biosynthesis           | 119 | 0.75 | 8.54  | 1.04 |
|                                              | Vitamin B6 metabolism                       | 39  | 0.89 | 6.27  | 1.03 |
|                                              | Biotin metabolism                           | 9   | 0.20 | 5.78  | 0.29 |
|                                              | Folate biosynthesis*                        | 74  | 0.85 | 5.30  | 0.34 |
|                                              | Riboflavin metabolism                       | 42  | 0.83 | 3.37  | 0.76 |
|                                              | Nicotinate and nicotinamide metabolism      | 91  | 0.88 | 3.26  | 0.94 |
|                                              | Porphyrin and chlorophyll metabolism        | 117 | 0.61 | 2.36  | 0.46 |
|                                              | Ubiquinone biosynthesis                     | 1   | 0.01 | 0.08  | 0.01 |
| <b>Biosynthesis of secondary metabolites</b> | Novobiocin biosynthesis                     | 46  | 0.83 | 29.59 | 0.54 |
|                                              | Stilbene, coumarine and lignin biosynthesis | 35  | 2.02 | 4.50  | 6.86 |
|                                              | Limonene and pinene degradation             | 22  | 0.38 | 3.53  | 0.46 |
|                                              | Alkaloid biosynthesis II                    | 16  | 1.17 | 3.42  | 2.19 |
|                                              | Alkaloid biosynthesis I                     | 9   | 0.27 | 2.89  | 0.15 |
|                                              | Streptomycin biosynthesis                   | 29  | 0.39 | 2.33  | 0.26 |
| <b>Xenobiotic Metabolism</b>                 | Benzoate degradation via CoA ligation       | 43  | 0.34 | 5.53  | 0.38 |
|                                              | Tetrachloroethene degradation               | 9   | 1.29 | 2.89  | 0.40 |
|                                              | 1,2-Dichloroethane degradation              | 17  | 0.63 | 2.73  | 0.93 |
|                                              | Caprolactam degradation                     | 7   | 0.15 | 2.25  | 0.15 |
|                                              | gamma-Hexachlorocyclohexane degradation     | 17  | 0.50 | 0.39  | 0.37 |
|                                              | 1- and 2-Methylnaphthalene degradation      | 2   | 0.08 | 0.21  | 0.05 |

\* - contains methanogenesis pathway.

<sup>†</sup>Odds ratios are shown for the human distal gut microbiome against all bacterial genomes in KEGG, the human genome, and all archaeal genomes in KEGG. All pathways shown are enriched (odds ratio > 1) or under-represented (odds ratio < 1) when compared to the human genome ( $P < 0.05$ ). NA indicates that a ratio could not be calculated, because there are no hits to the pathway in the comparison dataset. The odds ratios are a measure of relative gene content based on the number of independent hits to enzymes in each pathway; future studies will be necessary to experimentally validate these metabolic predictions. See <http://gordonlab.wustl.edu/supplemental/Gill/> for each of these maps



**Table S4.** Human distal gut microbiome shows enrichment (relative to all microbial genomes in STRING) for glycan degradation COGs

| Category           | COG     | Annotation                                                            | Total hits in microbiome | Odds Ratio (p<0.05) |
|--------------------|---------|-----------------------------------------------------------------------|--------------------------|---------------------|
| <b>General</b>     | COG1070 | Sugar (pentulose and hexulose) kinases                                | 30                       | 4.25                |
|                    | COG0061 | Predicted sugar kinase                                                | 22                       | 3.26                |
|                    | COG0366 | Glycosidases                                                          | 49                       | 2.97                |
|                    | COG1082 | Sugar phosphate isomerases/epimerases                                 | 12                       | 1.56                |
| <b>Arabinose</b>   | COG3534 | Alpha-L-arabinofuranosidase                                           | 11                       | 12.18               |
|                    | COG2160 | L-arabinose isomerase                                                 | 7                        | 9.44                |
| <b>Fructose</b>    | COG1621 | Beta-fructosidases (levanase/invertase)                               | 15                       | 6.74                |
|                    | COG0205 | 6-phosphofruktokinase                                                 | 31                       | 4.90                |
|                    | COG1105 | Fructose-1-phosphate kinase (PfkB)                                    | 8                        | 2.05                |
| <b>Fucose</b>      | COG2407 | L-fucose isomerase and related proteins                               | 23                       | 20.98               |
|                    | COG4154 | Fucose dissimilation pathway protein FucU                             | 4                        | 4.28                |
|                    | COG3669 | Alpha-L-fucosidase                                                    | 5                        | 3.04                |
| <b>Galactose</b>   | COG4468 | Galactose-1-phosphate uridylyltransferase                             | 19                       | 32.73               |
|                    | COG1486 | Alpha-galactosidases/6-phospho-beta-glucosidases                      | 23                       | 8.70                |
|                    | COG3250 | Beta-galactosidase/beta-glucuronidase                                 | 32                       | 5.42                |
|                    | COG3345 | Alpha-galactosidase                                                   | 4                        | 4.00                |
|                    | COG0153 | Galactokinase                                                         | 11                       | 3.63                |
|                    | COG2723 | Beta-glucosidase/6-phospho-beta-glucosidase/beta-galactosidase        | 34                       | 3.47                |
| <b>Glucuronose</b> | COG3661 | Alpha-glucuronidase                                                   | 4                        | 17.72               |
|                    | COG1904 | Glucuronate isomerase                                                 | 10                       | 7.95                |
|                    | COG3250 | Beta-galactosidase/beta-glucuronidase                                 | 32                       | 5.42                |
| <b>Glucosamine</b> | COG1820 | N-acetylglucosamine-6-phosphate deacetylase                           | 11                       | 2.60                |
|                    | COG0363 | 6-phosphogluconolactonase/Glucosamine-6-phosphate isomerase/deaminase | 16                       | 2.28                |
| <b>Glucose</b>     | COG3405 | Endoglucanase Y                                                       | 7                        | 11.43               |
|                    | COG3459 | Cellobiose phosphorylase                                              | 7                        | 8.68                |
|                    | COG0297 | Glycogen synthase                                                     | 24                       | 7.09                |
|                    | COG0296 | 1,4-alpha-glucan branching enzyme                                     | 27                       | 5.70                |
|                    | COG1523 | Pullulanase Pu1A and related glycosidases                             | 20                       | 5.13                |
|                    | COG2723 | Beta-glucosidase/6-phospho-beta-glucosidase/beta-galactosidase        | 34                       | 3.47                |
|                    | COG0166 | Glucose-6-phosphate isomerase                                         | 18                       | 3.05                |
|                    | COG1501 | Alpha-glucosidases, family 31 of glycosyl hydrolases                  | 17                       | 2.66                |
|                    | COG1472 | Beta-glucosidase-related glycosidases                                 | 18                       | 2.65                |
| <b>Mannose</b>     | COG1312 | D-mannonate dehydratase                                               | 18                       | 12.69               |
|                    | COG0246 | Mannitol-1-phosphate/altronate dehydrogenases                         | 17                       | 4.47                |
|                    | COG1482 | Phosphomannose isomerase                                              | 9                        | 2.49                |
|                    | COG1109 | Phosphomannomutase                                                    | 23                       | 1.72                |

| Category    | COG     | Annotation                                                                | Total hits in microbiome | Odds Ratio (p<0.05) |
|-------------|---------|---------------------------------------------------------------------------|--------------------------|---------------------|
| Rhamnose    | COG4806 | L-rhamnose isomerase                                                      | 5                        | 7.05                |
| Xylose      | COG3507 | Beta-xylosidase                                                           | 12                       | 8.09                |
| Transferase | COG1640 | 4-alpha-glucanotransferase                                                | 9                        | 3.36                |
| Transport   | COG4209 | ABC-type polysaccharide transport system, permease component              | 26                       | 25.20               |
|             | COG0395 | ABC-type sugar transport system, permease component                       | 56                       | 3.63                |
|             | COG2190 | Phosphotransferase system IIA components                                  | 21                       | 3.48                |
|             | COG1263 | Phosphotransferase system IIC components, glucose/maltose/GlcNAc-specific | 30                       | 2.90                |
|             | COG1129 | ABC-type sugar transport system, ATPase component                         | 31                       | 2.85                |
|             | COG1264 | Phosphotransferase system IIB components                                  | 30                       | 2.83                |
|             | COG1175 | ABC-type sugar transport systems, permease components                     | 39                       | 2.36                |
|             | COG1299 | Phosphotransferase system, fructose-specific IIC component                | 11                       | 2.03                |
|             | COG1593 | TRAP-type C4-dicarboxylate transport system, large permease component     | 12                       | 2.01                |
|             | COG1638 | TRAP-type C4-dicarboxylate transport system, periplasmic component        | 10                       | 1.82                |
|             | COG1080 | Phosphoenolpyruvate-protein kinase (PTS system EI component in bacteria)  | 8                        | 1.75                |
|             | COG1445 | Phosphotransferase system fructose-specific component IIB                 | 9                        | 1.74                |
|             | COG1653 | ABC-type sugar transport system, periplasmic component                    | 27                       | 1.65                |
|             | COG1879 | ABC-type sugar transport system, periplasmic component                    | 19                       | 1.58                |

**Table S5.** KEGG analysis shows presence of at least 81 glycoside hydrolase families in the distal gut microbiome. Only families that are not present in the human genome are shown.

| Glycoside Hydrolase Family | Family members                                                       | Hits in the distal gut microbiome |
|----------------------------|----------------------------------------------------------------------|-----------------------------------|
| 3                          | beta-glucosidase xylan 1,4-beta-xylosidase                           | 108                               |
| 4                          | Maltose-6-phosphate glucosidase alpha-glucosidase                    | 62                                |
| 5                          | Chitosanase beta-mannosidase Cellulase Glucan                        | 42                                |
| 7                          | endoglucanase cellobiohydrolase The cellobiohydrolases               | 35                                |
| 8                          | Chitosanase Cellulase Licheninase Endo-1,4-beta-xylanase             | 6                                 |
| 6                          | endoglucanase cellobiohydrolase The cellobiohydrolases               | 2                                 |
| 57                         | alpha-amylase 4-alpha-glucanotransferase                             | 67                                |
| 43                         | beta-xylosidase alpha-L-arabinofuranosidase                          | 65                                |
| 51                         | alpha-L-arabinofuranosidase endoglucanase                            | 61                                |
| 32                         | invertase inulinase levanase exo-inulinase                           | 56                                |
| 42                         | beta-galactosidase                                                   | 54                                |
| 10                         | xylanase endo-1,3-beta-xylanase cellobiohydrolase                    | 45                                |
| 77                         | amylomaltase or 4-alpha-glucanotransferase                           | 45                                |
| 73                         | endo-beta-N-acetylglucosaminidase beta-1,4-N-acetylmuramoylhydrolase | 40                                |
| 16                         | Xyloglucan:xyloglucosyl transferase Keratan-sulfate                  | 38                                |
| 12                         | endoglucanase xyloglucan hydrolase beta-1,3-1,4-glucanase            | 34                                |
| 26                         | mannanase beta-1,3-xylanase                                          | 34                                |
| 28                         | polygalacturonase exo-polygalacturonase                              | 34                                |

|     |                                                                |    |
|-----|----------------------------------------------------------------|----|
| 64  | beta-1,3-glucanase                                             | 33 |
| 82  | i-carrageenase                                                 | 33 |
| 88  | Deltalpha-4,5 unsaturated glucuronyl hydrolases                | 33 |
| 90  | Endorhamnosidases                                              | 33 |
| 92  | alpha-1,2-mannosidase                                          | 33 |
| 93  | exo-arabinanase                                                | 33 |
| 96  | alpha-agarase                                                  | 33 |
| 98  | endo-beta-galactosidase                                        | 33 |
| 102 | peptidoglycan lytic transglycosylase                           | 33 |
| 103 | peptidoglycan lytic transglycosylase                           | 33 |
| 104 | peptidoglycan lytic transglycosylase                           | 33 |
| 105 | unsaturated rhamnogalacturonyl hydrolase                       | 33 |
| 54  | alpha-L-arabinofuranosidase beta-xylosidase                    | 27 |
| 52  | beta-xylosidase                                                | 21 |
| 70  | Dextranucrase Alternansucrase                                  | 18 |
| 94  | cellobiose phosphorylase cellodextrin phosphorylase            | 18 |
| 66  | cycloisomaltooligosaccharide glucanotransferase                | 16 |
| 17  | Glucan endo-1,3-beta-D-glucosidase Glucan                      | 15 |
| 72  | beta-1,3-glucanosyltransglycosylase                            | 15 |
| 14  | beta-amylase                                                   | 11 |
| 62  | alpha-L-arabinofuranosidase                                    | 11 |
| 68  | levansucrase beta-fructofuranosidase                           | 9  |
| 36  | alpha-galactosidase alpha-N-acetylgalactosaminidase            | 8  |
| 100 | alkaline and neutral invertase                                 | 8  |
| 11  | xylanase                                                       | 5  |
| 78  | alpha-L-rhamnosidase                                           | 5  |
| 106 | alpha-L-rhamnosidase                                           | 5  |
| 67  | alpha-glucuronidase                                            | 3  |
| 97  | alpha-glucosidase                                              | 3  |
| 19  | chitinase                                                      | 2  |
| 25  | lysozyme                                                       | 2  |
| 48  | endoglucanase cellobiohydrolase                                | 2  |
| 15  | glucoamylase glucoextranase                                    | 1  |
| 34  | sialidase or neuraminidase                                     | 1  |
| 44  | endoglucanase                                                  | 1  |
| 45  | endoglucanase                                                  | 1  |
| 49  | Dextranase Isopullulanase Dextran 1,6-alpha-isomaltotriosidase | 1  |
| 61  | endoglucanase                                                  | 1  |
| 74  | endoglucanase oligoxyloglucan reducing end-specific            | 1  |
| 83  | hemagglutinin-neuraminidase                                    | 1  |
| 95  | alpha-L-fucosidase                                             | 1  |

**Table S6.** Human distal gut microbiome shows enrichment (relative to all microbial genomes in STRING) for genes involved in fermentation of carbohydrates.

| End Product                      | COG     | Annotation                                                       | Total hits in microbiome | Odds Ratio (p<0.05) |
|----------------------------------|---------|------------------------------------------------------------------|--------------------------|---------------------|
| <b>Butyrate</b>                  | COG3426 | Butyrate kinase                                                  | 6                        | 9.30                |
| <b>Acetate</b>                   | COG0282 | Acetate kinase                                                   | 16                       | 3.31                |
| <b>Lactate</b>                   | COG2055 | Malate/L-lactate dehydrogenases                                  | 8                        | 2.85                |
|                                  | COG0039 | Malate/lactate dehydrogenases                                    | 26                       | 2.70                |
|                                  | COG1052 | Lactate dehydrogenase and related dehydrogenases                 | 17                       | 2.14                |
| <b>CO<sub>2</sub>/Acetyl-CoA</b> | COG1014 | Pyruvate:ferredoxin oxidoreductase, gamma subunit                | 13                       | 2.08                |
|                                  | COG1013 | Pyruvate:ferredoxin oxidoreductase, beta subunit                 | 10                       | 2.05                |
|                                  | COG0674 | Pyruvate:ferredoxin oxidoreductase, alpha subunit                | 9                        | 1.78                |
| <b>Succinate</b>                 | COG1053 | Succinate dehydrogenase/fumarate reductase, flavoprotein subunit | 15                       | 1.60                |

**Table S7.** Human distal gut microbiome shows enrichment (relative to all microbial genomes in STRING) for vitamin biosynthetic COGs.

| Vitamin           | COG     | Annotation                                                                             | Total hits in microbiome | Odds Ratio (p<0.05) |
|-------------------|---------|----------------------------------------------------------------------------------------|--------------------------|---------------------|
| <b>Folate</b>     | COG0720 | 6-pyruvoyl-tetrahydropterin synthase                                                   | 8                        | 1.87                |
|                   | COG0190 | 5,10-methylene-tetrahydrofolate dehydrogenase/Methenyl tetrahydrofolate cyclohydrolase | 12                       | 1.71                |
| <b>Isoprenoid</b> | COG0743 | 1-deoxy-D-xylulose 5-phosphate reductoisomerase, dxr                                   | 37                       | 10.09               |
|                   | COG1154 | Deoxyxylulose-5-phosphate synthase, dxs                                                | 35                       | 8.63                |
|                   | COG0821 | Enzyme involved in the deoxyxylulose pathway of isoprenoid biosynthesis, ispG          | 29                       | 7.70                |
|                   | COG1947 | 4-diphosphocytidyl-2C-methyl-D-erythritol 2-phosphate synthase, ispE                   | 20                       | 4.89                |
|                   | COG0761 | Penicillin tolerance protein, ispH                                                     | 17                       | 4.40                |
|                   | COG1211 | 4-diphosphocytidyl-2-methyl-D-erythritol synthase, ispD                                | 16                       | 3.47                |
|                   | COG0245 | 2C-methyl-D-erythritol 2,4-cyclodiphosphate synthase, ispF                             | 12                       | 3.16                |
| <b>Thiamine</b>   | COG0301 | Thiamine biosynthesis ATP pyrophosphatase                                              | 29                       | 9.78                |
|                   | COG0422 | Thiamine biosynthesis protein, ThiC                                                    | 29                       | 8.25                |
|                   | COG2022 | Thiamine biosynthesis protein, ThiG                                                    | 14                       | 4.94                |
|                   | COG0352 | Thiamine monophosphate synthase, ThiE                                                  | 24                       | 4.43                |
|                   | COG1060 | Thiamine biosynthesis enzyme, ThiH                                                     | 17                       | 4.22                |
| <b>Vitamin B6</b> | COG0214 | Pyridoxine biosynthesis enzyme                                                         | 15                       | 7.05                |
|                   | COG0311 | Predicted glutamine amidotransferase involved in pyridoxine biosynthesis               | 5                        | 2.63                |
|                   | COG2240 | Pyridoxal/pyridoxine/pyridoxamine kinase                                               | 6                        | 2.09                |

|                    |         |                                     |    |      |
|--------------------|---------|-------------------------------------|----|------|
| <b>Vitamin B12</b> | COG1903 | Cobalamin biosynthesis protein CbiD | 15 | 9.69 |
|                    | COG1492 | Cobyric acid synthase               | 12 | 4.71 |
|                    | COG1797 | Cobyric acid a,c-diamide synthase   | 10 | 4.49 |
|                    | COG1010 | Precorrin-3B methylase              | 7  | 3.39 |
|                    | COG2099 | Precorrin-6x reductase              | 4  | 2.88 |

**Table S8.** Human distal gut microbiome shows enrichment (relative to all microbial genomes in STRING) for amino acid biosynthetic COGs.

| <b>Amino Acid Metabolism</b>              | <b>COG</b>                           | <b>Annotation</b>                                               | <b>Total hits in microbiome</b> | <b>Odds Ratio (p&lt;0.05)</b> |
|-------------------------------------------|--------------------------------------|-----------------------------------------------------------------|---------------------------------|-------------------------------|
| <b>Alanine, aspartate and asparagines</b> | COG2502                              | Asparagine synthetase A                                         | 24                              | 19.08                         |
|                                           | COG0367                              | Asparagine synthase (glutamine-hydrolyzing)                     | 40                              | 6.97                          |
|                                           | COG1027                              | Aspartate ammonia-lyase                                         | 6                               | 2.24                          |
|                                           | COG0520                              | Selenocysteine lyase                                            | 14                              | 1.70                          |
| <b>Arginine</b>                           | COG4187                              | Arginine degradation protein                                    | 5                               | 15.51                         |
|                                           | COG4992                              | Ornithine/acetylornithine aminotransferase*                     | 32                              | 4.59                          |
|                                           | COG0137                              | Argininosuccinate synthase*                                     | 19                              | 3.95                          |
|                                           | COG0078                              | Ornithine carbamoyltransferase*                                 | 20                              | 3.45                          |
|                                           | COG0165                              | Argininosuccinate lyase*                                        | 16                              | 3.45                          |
|                                           | COG3869                              | Arginine kinase                                                 | 6                               | 2.27                          |
| <b>Beta-Alanine</b>                       | COG0421                              | Spermidine synthase**                                           | 14                              | 2.65                          |
| <b>Glutamate</b>                          | COG1364                              | N-acetylglutamate synthase (N-acetylornithine aminotransferase) | 29                              | 10.84                         |
|                                           | COG0014                              | Gamma-glutamyl phosphate reductase                              | 30                              | 7.38                          |
|                                           | COG0458                              | Carbamoylphosphate synthase large subunit                       | 40                              | 5.91                          |
|                                           | COG0263                              | Glutamate 5-kinase                                              | 24                              | 5.81                          |
|                                           | COG0548                              | Acetylglutamate kinase                                          | 27                              | 4.98                          |
|                                           | COG0070                              | Glutamate synthase domain 3                                     | 13                              | 3.45                          |
|                                           | COG0067                              | Glutamate synthase domain 1                                     | 13                              | 3.20                          |
|                                           | COG0549                              | Carbamate kinase                                                | 8                               | 3.10                          |
|                                           | COG0505                              | Carbamoylphosphate synthase small subunit                       | 18                              | 2.97                          |
|                                           | COG0069                              | Glutamate synthase domain 2                                     | 13                              | 2.52                          |
|                                           | COG0002                              | Acetylglutamate semialdehyde dehydrogenase                      | 9                               | 2.31                          |
|                                           | <b>Glycine, serine and threonine</b> | COG1897                                                         | Homoserine trans-succinylase    | 18                            |
| COG3048                                   |                                      | D-serine dehydratase                                            | 3                               | 4.23                          |
| COG2008                                   |                                      | Threonine aldolase                                              | 10                              | 3.16                          |
| COG0112                                   |                                      | Glycine/serine hydroxymethyltransferase                         | 22                              | 3.12                          |
| COG0498                                   |                                      | Threonine synthase                                              | 17                              | 2.85                          |
| COG1063                                   |                                      | Threonine dehydrogenase and related Zn-dependent dehydrogenases | 20                              | 1.52                          |
| <b>Histidine</b>                          | COG3705                              | ATP phosphoribosyltransferase (histidine biosynthesis)          | 14                              | 9.24                          |

|                |         |                                                                           |    |      |
|----------------|---------|---------------------------------------------------------------------------|----|------|
|                | COG0141 | Histidinol dehydrogenase                                                  | 35 | 8.90 |
|                | COG0131 | Imidazoleglycerol-phosphate dehydratase                                   | 31 | 8.15 |
|                | COG0040 | ATP phosphoribosyltransferase                                             | 22 | 5.78 |
|                | COG0107 | Imidazoleglycerol-phosphate synthase                                      | 19 | 4.68 |
|                | COG0079 | Histidinol-phosphate/aromatic aminotransferase/cobyric acid decarboxylase | 27 | 3.43 |
| <b>Leucine</b> | COG2309 | Leucyl aminopeptidase (aminopeptidase T)                                  | 5  | 2.63 |

| <b>Amino Acid Metabolism</b>                     | <b>COG</b>                            | <b>Annotation</b>                                                          | <b>Total hits in microbiome</b>             | <b>Odds Ratio (p&lt;0.05)</b> |
|--------------------------------------------------|---------------------------------------|----------------------------------------------------------------------------|---------------------------------------------|-------------------------------|
| <b>Lysine</b>                                    | COG0289                               | Dihydrodipicolinate reductase                                              | 12                                          | 2.84                          |
|                                                  | COG0019                               | Diaminopimelate decarboxylase                                              | 19                                          | 2.28                          |
|                                                  | COG0527                               | Aspartokinases                                                             | 17                                          | 2.21                          |
|                                                  | COG0329                               | Dihydrodipicolinate synthase/N-acetylneuraminatase lyase                   | 21                                          | 1.94                          |
|                                                  | COG0136                               | Aspartate-semialdehyde dehydrogenase                                       | 10                                          | 1.69                          |
| <b>Methionine</b>                                | COG0620                               | Methionine synthase II (cobalamin-independent)                             | 21                                          | 4.23                          |
| <b>Phenylalanine, tyrosine and tryptophan***</b> | COG1685                               | Archaeal shikimate kinase                                                  | 4                                           | 7.75                          |
|                                                  | COG0128                               | 5-enolpyruvylshikimate-3-phosphate synthase                                | 32                                          | 6.05                          |
|                                                  | COG0710                               | 3-dehydroquinate dehydratase                                               | 9                                           | 4.43                          |
|                                                  | COG0169                               | Shikimate 5-dehydrogenase                                                  | 28                                          | 4.22                          |
|                                                  | COG0337                               | 3-dehydroquinate synthetase                                                | 19                                          | 3.90                          |
|                                                  | COG0082                               | Chorismate synthase                                                        | 19                                          | 3.88                          |
|                                                  | COG0722                               | 3-deoxy-D-arabino-heptulosonate 7-phosphate (DAHP) synthase                | 14                                          | 3.34                          |
|                                                  | COG2876                               | 3-deoxy-D-arabino-heptulosonate 7-phosphate (DAHP) synthase                | 6                                           | 2.91                          |
|                                                  | COG0133                               | Tryptophan synthase beta chain                                             | 12                                          | 2.84                          |
|                                                  | COG0757                               | 3-dehydroquinate dehydratase II                                            | 8                                           | 2.67                          |
|                                                  | COG0547                               | Anthranilate phosphoribosyltransferase                                     | 11                                          | 2.16                          |
|                                                  | COG0135                               | Phosphoribosylanthranilate isomerase                                       | 8                                           | 1.98                          |
|                                                  | COG0512                               | Anthranilate/para-aminobenzoate synthases component II                     | 11                                          | 1.66                          |
|                                                  | <b>Valine, leucine and isoleucine</b> | COG0065                                                                    | 3-isopropylmalate dehydratase large subunit | 44                            |
| COG0129                                          |                                       | Dihydroxyacid dehydratase/phosphogluconate dehydratase                     | 29                                          | 4.37                          |
| COG0066                                          |                                       | 3-isopropylmalate dehydratase small subunit                                | 18                                          | 3.77                          |
| COG0059                                          |                                       | Ketol-acid reductoisomerase                                                | 13                                          | 3.08                          |
| COG0119                                          |                                       | Isopropylmalate/homocitrate/citramalate synthases                          | 16                                          | 1.72                          |
| <b>Peptidases</b>                                | COG1362                               | Aspartyl aminopeptidase                                                    | 25                                          | 16.50                         |
|                                                  | COG2195                               | Di- and tripeptidases                                                      | 18                                          | 4.20                          |
| <b>Transferases</b>                              | COG0118                               | Glutamine amidotransferase                                                 | 17                                          | 4.18                          |
|                                                  | COG0115                               | Branched-chain amino acid aminotransferase/4-amino-4-deoxychorismate lyase | 27                                          | 2.51                          |
|                                                  | COG0436                               | Aspartate/tyrosine/aromatic aminotransferase                               | 25                                          | 1.30                          |

|                     |         |                                                                           |    |      |
|---------------------|---------|---------------------------------------------------------------------------|----|------|
| <b>Transporters</b> | COG1687 | Predicted branched-chain amino acid permeases (azaleucine resistance)     | 4  | 7.30 |
|                     | COG0747 | ABC-type dipeptide transport system, periplasmic component                | 55 | 2.97 |
|                     | COG1126 | ABC-type polar amino acid transport system, ATPase component              | 32 | 2.46 |
|                     | COG0444 | ABC-type dipeptide/oligopeptide/nickel transport system, ATPase component | 28 | 2.31 |
|                     | COG4608 | ABC-type oligopeptide transport system, ATPase component                  | 22 | 2.13 |
|                     | COG0765 | ABC-type amino acid transport system, permease component                  | 23 | 1.28 |

\* - enzyme in the urea cycle

\*\* - also involved in synthesis of biogenic amines

\*\*\* - includes shikamate pathway

## Supporting References

- S1. G. C. Baker, J. J. Smith, D. A. Cowan, *J Microbiol Methods* **55**, 541 (Dec, 2003).
- S2. S. Bartosch, A. Fite, G. T. Macfarlane, M. E. McMurdo, *Appl Environ Microbiol* **70**, 3575 (Jun, 2004).
- S3. J. C. Venter *et al.*, *Science* **304**, 66 (Apr 2, 2004).
- S4. E. W. Myers *et al.*, *Science* **287**, 2196 (Mar 24, 2000).
- S5. S. Kurtz *et al.*, *Genome Biol* **5**, R12 (2004).
- S6. A. L. Delcher, D. Harmon, S. Kasif, O. White, S. L. Salzberg, *Nucleic Acids Res* **27**, 4636 (Dec 1, 1999).
- S7. L. B. Koski, G. B. Golding, *J Mol Evol* **52**, 540 (Jun, 2001).
- S8. B. L. Maidak *et al.*, *Nucleic Acids Res* **29**, 173 (Jan 1, 2001).
- S9. W. Ludwig *et al.*, *Nucleic Acids Res* **32**, 1363 (2004).
- S10. P. D. Schloss, J. Handelsman, *Appl Environ Microbiol* **71**, 1501 (Mar, 2005).
- S11. M. Riley, *Microbiol Rev* **57**, 862 (Dec, 1993).
- S12. M. Pop, A. Phillippy, A. L. Delcher, S. L. Salzberg, *Brief Bioinform* **5**, 237 (Sep, 2004).
- S13. M. A. Schell *et al.*, *Proc Natl Acad Sci U S A* **99**, 14422 (Oct 29, 2002).
- S14. J. Xu *et al.*, *Science* **299**, 2074 (Mar 28, 2003).
- S15. <http://gordonlab.wustl.edu/supplemental/Gill/Msmithii/draftgenome/>
- S16. C. von Mering *et al.*, *Nucleic Acids Res* **33**, D433 (Jan 1, 2005).
